# Supplementary material
Source: PubMed Central journal article supplement (PMC4031524)
Supplement: supp_M114.548180_jbc.M114.548180-1.pdf [file supp_M114.548180_jbc.M114.548180-1.pdf]

**TABLE S1**

Oligonucleotides used in this study. FWD, forward. REV, reverse.

| Primer name                      | Sequence                                               |
|----------------------------------|--------------------------------------------------------|
| #1-DNA chemical perturbation_FWD | TAGTAGTATGAATTTGCCGCAAGATCTGAT                         |
| #2-DNA chemical perturbation_REV | ATCAGATCTTGCGCAAATTCATACTACTA                          |
| #3-BlaI operator op1_FWD         | GAAAGTATTACATATGTAAGATTTAAATGC                         |
| #4-BlaI operator op1_REV         | GCATTTAAATCTTACATATGTAATACTTTC                         |
| #5-Q30A_FWD                      | ATCATCCTGAGGTACCTGCAAGAACAAAACCGGCCCTACAGCGCCGCGGACGTG |
| #6-K38A_FWD                      | GGACGTGTTTCGGAAACCTACAGGCGGAACATGGACTGGGCAAGGCGGCGG    |
| #7-K44A_FWD                      | CTACAGAAGGAACATGGACTGGGCGCGGCGGCGGTAGTGAAGGCGCTGGATC   |
| #8-K49A_FWD                      | GGACTGGGCAAGGCGGCGGTAGTGGCGGCGCTGGATCAGCTGGCCCAAGG     |
| #9-D52A_FWD                      | GGCGGTAGTGAAGGCGCTGGCTCAGCTGGCCCAAGGAAGGCAAG           |
| #10-E57A_FWD                     | GAAAGGCGCTGGATCAGCTGGCCCAAGGCAAGATCAAAGAGAAG           |
| #11-E62A_FWD                     | GCCCAAGGAAGGCAAGATCAAAGCGAAGACCTACGGCAAGCAGA           |
| #12-K67A_FWD                     | CAAAGAGAAGACCTACGGCGCGCAGAAAATTTATTTTGGCC              |
| #13-Q68A_FWD                     | CAAGAAGACCTACGGCAAGGCGAAAATTTATTTTGGCGATCATCAGAAC      |
| #14-K69A_FWD                     | AGAAGACCTACGGCAAGCAGGCAATTTATTTTGGCGATCAGAA            |
| #15-Y71A_FWD                     | GACCTACGGCAAGCAGAAAATTGCTTTTGGCGATCAGAACCAG            |
| #16-Q30A_K44A_FWD                | CTACAGAAGGAACATGGACTGGGCGCGGCGGCGGTAGTGAAGGCGCTGGATC   |
| #17-Q30A_K38A_FWD                | GGACGTGTTTCGGAAACCTACAGGCGGAACATGGACTGGGCAAGGCGGCGG    |
| #18-Y65A_K67A_FWD                | GGCAAGATCAAAGAGAAGACCGCCGCGCGCAGAAAATTTATTTTGGCGAT     |
| #19-Q30A_K38A_K44A_FWD           | TACAGGCGGAACATGGACTGGGCGCGGCGGCGGTAGTGAAGGCGCTGGAT     |
| #20-Q30A_K44A_K49A_FWD           | CTGGGCGCGGCGGCGGTAGTGGCGGCGCTGGATCAGCTGGCCCA           |
| #21-K63A_Y65A_K67A_FWD           | CAGGAAGGCAAGATCAAAGAGGCGACCGCCGCGCGCAGAAAATTTATTT      |
| #22-Y65A_K67A_Q68_FWD            | GATCAAAGAGAAGACCGCCGCGCGGCGAAAATTTATTTTGGCGATCAG       |
| #23-gRSFDuet_REV                 | GGTTTCTTTACCAGACTCGAGCCTCAGGGGTCGGGGAGCAAAAACATTATG    |
